# Supplementary material
Source: Research Square preprint supplement (doi:10.21203/rs.3.rs-9399262/v1)

## 广东省动物实验证明

设施使用单位：暨南大学

No. SYXK (粤) 2022-01742025011146

| 实验名称   | 大网膜来源脂肪细胞去分化及重编程对小鼠预构皮瓣修复作用的影响 |      |                                          |                    |    |    |
|--------|--------------------------------|------|------------------------------------------|--------------------|----|----|
| 用途     | 科学研究                           |      |                                          |                    |    |    |
| 实验负责人  | 刘宏伟                            | 起止时间 | 2025-12-17至2026-02-01                    |                    |    |    |
| 备注     | 无                              |      |                                          |                    |    |    |
| 设施类别   | 动物品种品系                         | 等级   | 来源证号                                     | 数量                 |    |    |
|        |                                |      |                                          | 雄性                 | 雌性 | 合计 |
| 屏障环境   | 小鼠, C57BL/6                    | SPF级 | SCXK (粤) 2025-00532025553329<br>(质量合格证明) | 15                 | 0  | 15 |
| 检测日期   | -                              | 检测单位 | -                                        | 检测结果               | -  |    |
| 设施单位盖章 | 暨南大学<br>实验动物管理中心               |      | 许可证号                                     | SYXK (粤) 2022-0174 |    |    |

设施负责人：牛海涛

经手人：陶梦婷

日期：2025-12-21

|                           |        |                      |                   |
|---------------------------|--------|----------------------|-------------------|
| 伦理申请编号<br>Application No: | 107506 | 批准编号<br>Approval No. | IACUC-20251107-03 |
|---------------------------|--------|----------------------|-------------------|

本动物实验方案经过暨南大学实验动物福利伦理委员会审核，符合动物保护、动物福利和伦理原则，符合国家实验动物福利伦理的相关规定。方案的相关信息如下：

The Animal Experiment Protocol listed below has been reviewed and approved by Laboratory Animal Welfare and Ethics Committee of Jinan University.

|                                 |                                                                                                                            |                                 |                            |
|---------------------------------|----------------------------------------------------------------------------------------------------------------------------|---------------------------------|----------------------------|
| 实验名称<br>Protocol Title          | 大网膜来源脂肪细胞去分化及重编程对小鼠预构皮瓣修复作用的影响                                                                                             |                                 |                            |
|                                 | Effects of De-differentiation and Reprogramming of Omental-Derived Adipocytes on the Repair of Prefabricated Flaps in Mice |                                 |                            |
| 申请人姓名<br>Applicant              | 赵晨                                                                                                                         | 邮箱<br>Email                     | liuhongwei0521@hotmail.com |
| 项目负责人<br>Principal Investigator | 刘宏伟                                                                                                                        | 邮箱<br>Email                     | liuhongwei0521@hotmail.com |
| 院系(部门)<br>Department            | 第一临床医学院000000                                                                                                              |                                 |                            |
| 拟实验时间<br>Period of Protocol     | 2025-11-15<br>-<br>2025-12-31                                                                                              | 实验动物使用许可证<br>Period of Protocol | SYXK(粤)2022-0174           |
| 审核意见<br>Results of Inspection   | <input checked="" type="checkbox"/> 符合动物福利伦理要求，可以进行实验。Agree<br><input type="checkbox"/> 调整方案后，可以进行实验。Agree after modify    |                                 |                            |

暨南大学实验动物福利伦理委员会  
 Laboratory Animal Welfare and  
 Ethics Committee of Jinan  
 University

主任委员 (Chairman)

日期 (Date): 2025-11-10

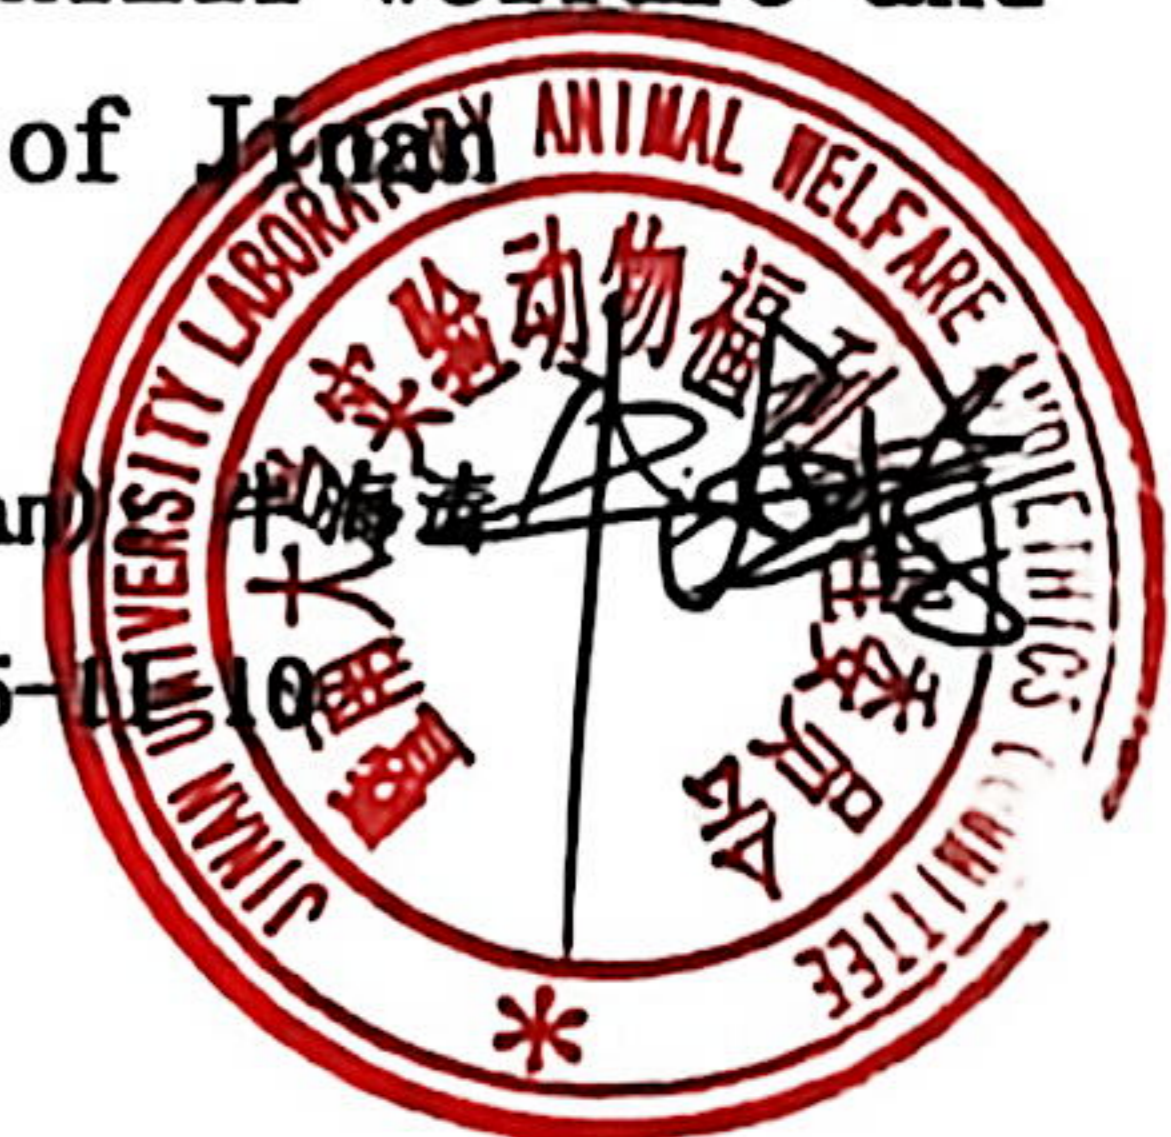

Supplement: Supplementary file 4 [file dee30334a3c9acc7f2d17fa3.pdf]
