# Supplementary material
Source: Research Square preprint supplement (doi:10.21203/rs.3.rs-9399262/v1)
Supplement: Supplementary file 3 [file 8992a95f1cffde55aea27a36.docx]

| REAGENT or RESOURCE | SOURCE | IDENTIFIER |
| --- | --- | --- |
| Antibodies | | |
| Anti-CD31 antibody rabbit monoclonal | Abcam | ab222783 |
| Anti-alpha smooth muscle actin mouse monoclonal | Abcam | ab7817 |
| Anti-Perilipin-1 rabbit monoclonal | Abcam | ab172907 |
| Anti-Adiponectin rabbit monoclonal | Abcam | ab181281 |
| Anti-GFP | Abcam | ab290 |
| Anti-CD45 rabbit Polyclonal | Proteintech | 20103-1-AP |
| Anti-CD45 rabbit Polyclonal | Proteintech | 12594-1-AP |
| Anti-F4/80 rabbit Polyclonal | Proteintech | 28463-1-AP |
| Anti- CD163 rabbit Polyclonal | Proteintech | 16646-1-AP |
| Anti- iNOS rabbit Polyclonal | Proteintech | 22226-1-AP |
| Anti-Collagen I rabbit monoclonal | Abcam | ab138492 |
| Anti-Vimentin rabbit monoclonal | Abcam | ab92547 |
| Anti-SOX9 mouse monoclonal | Proteintech | 67439-1-Ig |
| Anti-Beta Actin | Proteintech | 20536-1-AP |
| Anti-Beta Tubulin | Proteintech | 10094-1-AP |
| Anti C/EBPB Rabbit mAb | ABclonal | A19538 |
| Anti- PPAR Gamma rabbit Polyclonal | Proteintech | 16643-1-AP |
| Virus strains | | |
| pSLenti-EF1-EGFP-P2A-Puro-CMV-Cebpb-3xFLAG-WPRE | OBiO Technology ( Shanghai ) Corp.,Ltd. | N/A |
| Critical commercial assays | | |
| H&E staining kit | Solarbio | G1120 |
| Masson staining kit | Solarbio | G1340 |
| DAB substrate kit | Abcam | ab64238 |
| qPCR kit | GenStar | A301-10 |
| Four-color Fluorescence kit | Recordbio | RC0086-34RM |
|  |  |  |
| Deposited data | | |
| RNA sequencing | OE Biotech Co., Ltd( Shanghai ) |  |
| Single-Nucleus RNA Sequencing | Genedenovo Biotechnology Co., Ltd (Guangzhou, China). |  |
| Experimental models: Cell lines | | |
| 3T3-L1 | Servicebio (Wuhan, China) | STCC20001G |
| Raw264.7 | Servicebio (Wuhan, China) | STCC20001G |
| Experimental models: Organisms/strains | | |
| Mouse: C57BL/6J mice | Biotechnology Co., Ltd. (Zhaoqing, China) |  |
| Mouse: AdipoqCre; ROSA26mT/mG mice, | Cyagen | Catalog C001529 |
| Oligonucleotides | | |
| Software and algorithms |  |  |
| Fiji (ImageJ) | NIH | https://fiji.sc |
| Adobe Photoshop | Adobe | https://www.adobe.com/products/ photoshop.html |
| Adobe Illustrator | Adobe | https://www.adobe.com/products/ illustrator.html |
| GraphPad Prism 10 | GraphPad Software, Inc | https://www.graphpad.com |
| BioRender | BioRender | https://www.biorender.com |
|  |  |  |
